# Supplementary material
Source: MDPI journal article supplement (https://www.mdpi.com/2077-0472/14/5/706)
Supplement: s1 [file s1]

**Table S1.** Primers for the amplification of the *OsCesA7* gene.

| Position | Primer F              | Primer R               | Tm                 |
|----------|-----------------------|------------------------|--------------------|
| B1FB1R   | GACCTATTGTGTGCTTTCCTC | CGATCATGCCAAAGTTCACAAG | 60                 |
| MF1MR1   | CTGGGAAGGATCTGGAGCAG  | GTAGACGATGGTGTGGTGTAG  | 65 (10X), 55 (25X) |
| P4FP5R   | TCATCAAGGAGGCCATCCAC  | GACCAGCATTCTGGGTCAGA   | 60                 |

The *OsCesA7* sequencing was downloaded from the ROOTomics (<https://rootomics.dna.affrc.go.jp/>).

The primers were synthesized by Integrated DNA Technologies, Inc. with Desalted purification.

**Table S2.** Agronomic traits of the green brittle (GB) variety, its parents (AZ1803 and CS11), and check line (IR64) in 2021 1<sup>st</sup> crop season.

| Trait                   | AZ1803       | CS11            | GB           | IR64         |
|-------------------------|--------------|-----------------|--------------|--------------|
| Brittleness             | Yes          | No              | Yes          | No           |
| Vegetative vigor        | Normal       | Normal          | Normal       | Normal       |
| Culm strength           | Intermediate | Moderately      | Intermediate | Intermediate |
| Plant height            | Semi dwarf   | Intermediate    | Semi dwarf   | Semi dwarf   |
| Leaf senescence         | Intermediate | Late            | Intermediate | Intermediate |
| Panicle exertion        | Well exerted | Moderately well | Just exerted | Well exerted |
| Panicle thresh ability  | Easy         | Intermediate    | Easy         | Easy         |
| Maturity (days)         | 112          | 120             | 114          | 112          |
| Leaf length (cm)        | 38.17±1.04   | 39.33±4.25      | 34.17±3.19   | 37.07±3.30   |
| Leaf width (cm)         | 1.37±0.06    | 1.53±0.15#      | 13.6±0.09    | 1.42±0.10    |
| Leaf blade pubescence   | Intermediate | Late            | Late         | Intermediate |
| Leaf blade color        | Green        | Green           | Green        | Green        |
| Basal leaf sheath color | Green        | Green           | Green        | Green        |
| Leaf angle/attitude     | Erect        | Erect           | Erect        | Erect        |
| Flag leaf angle         | Erect        | Erect           | Erect        | Erect        |
| Culm angle              | Open         | Intermediate    | Intermediate | Open         |
| Culm internode color    | Green        | Green           | Green        | Green        |
| Panicle type            | Compact      | Intermediate    | Compact      | Compact      |
| Panicle axis            | Droopy       | Straight        | Droopy       | Droopy       |

The traits were investigated following standard evaluation system (SES) guide book. Leaf length and leaf width was investigated by 20 plants ( $n = 20$ ).

**Table S3.** The linkage SSR markers for the selection of *AZ1803* and *Xa* gene selection.

| Gene          | Chr. | Marker  | Primer F                 | Primer R                  |
|---------------|------|---------|--------------------------|---------------------------|
| <i>AZ1803</i> | 10   | RM271   | TCAGATCTACAATTCCATCC     | TCGGTGAGACCTAGAGAGCC      |
|               |      | RM5392  | GCCGTCTACCTCATGGTCAC     | CCATAACCGTGGTGTTTGAG      |
| <i>xa5</i>    | 5    | RM153   | GCCTCGAGCATCATCATCAG     | ATCAACCTGCACTTGCCTGG      |
|               |      | RM611   | CAACAAGATGGCCTCTTACC     | TACAAACAAACAGCTTGTGC      |
| <i>Xa7</i>    | 6    | RM20582 | AGAGCGTCGTCCTTCACCATCC   | GGCCAATACGACGATACATTACACG |
|               |      | RM3138  | TTGACAAGAGATCAAGGCGG     | GTGAATGTTGAGCTGCATGG      |
| <i>xa13</i>   | 8    | RM149   | GCTGACCAACGAACCTAGGCCG   | GTTGGAAGCCTTTCCTCGTAACACG |
|               |      | RM3761  | CCTCAACAATAGCACCACCC     | CTGCAAGTCTGCAAGCACAG      |
| <i>Xa21</i>   | 11   | RM16914 | TTTAAAGAAGCCCTCCTCCTTAGC | ACAGGGACGAGGAAGAAGAAGC    |
|               |      | PTA248  | GACGCGGAAGGGTGGTTCCCGGA  | GACGCGTAATCGAAAGATGAAA    |

*AZ1803* is the brittleness gene in *AZ1803* mutant line. *xa5*, *Xa7*, *xa13*, and *Xa21* are bacterial blight resistant genes in CS11 variety.
